# Supplementary material for: Base or nucleophile? DFT finally elucidates the origin of the selectivity between the competitive reactions triggered by MeLi or LDA on propanal
Source: Royal Society of Chemistry journal article supplement (doi:10.1039/c5cc01549a), 2015-01-01
Supplement: c5cc01549a1.pdf [file c5cc01549a1.pdf]

# Base or Nucleophile? DFT Finally Elucidates the Origin of the Selectivity Between the Competitive Reactions Triggered by MeLi or LDA on Propanal

J. Marchois,<sup>a</sup> C. Fressigné,<sup>\*,a</sup> B. Lecachey,<sup>a</sup> J. Maddaluno<sup>\*,a</sup>

## Supplementary Information

**Figure 1S** : Energy profiles for the addition ( $\gamma = 0$ ) of the three conformers of propanal ( $\theta = 0, 120, 240$ ) by  $(\text{MeLi})_2\text{-3THF}$ .

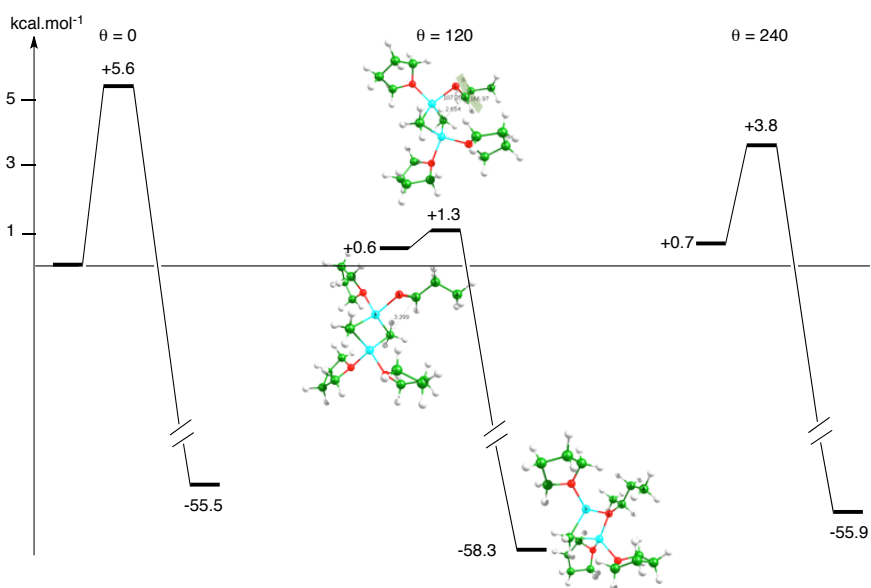

**Figure 2S** : Energy profiles for the deprotonation ( $\gamma = 180$ ) of two conformers of propanal ( $\theta = 120, 240$ ) by  $(\text{MeLi})_2\text{-3THF}$ .

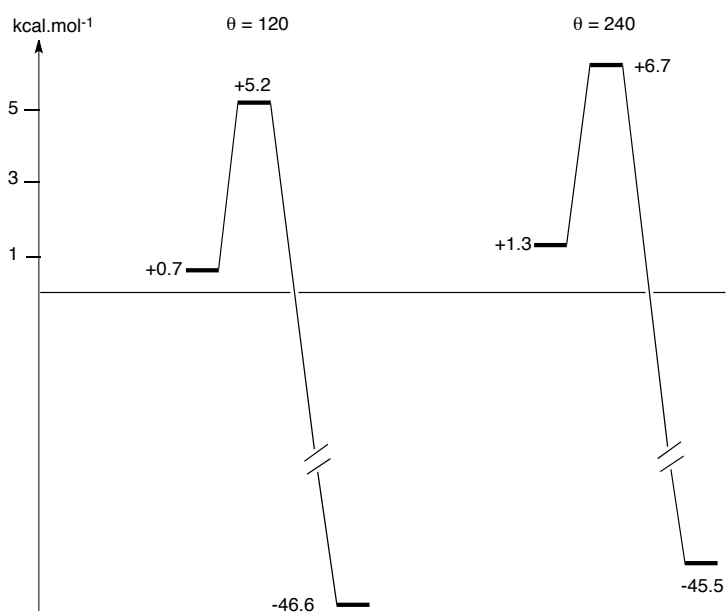

**Figure 3S** : Energy profiles for the addition ( $\gamma = 0$ ) of the three conformers of propanal ( $\theta = 0, 120, 240$ ) by  $(\text{LDA})_2\text{-2THF}$ .

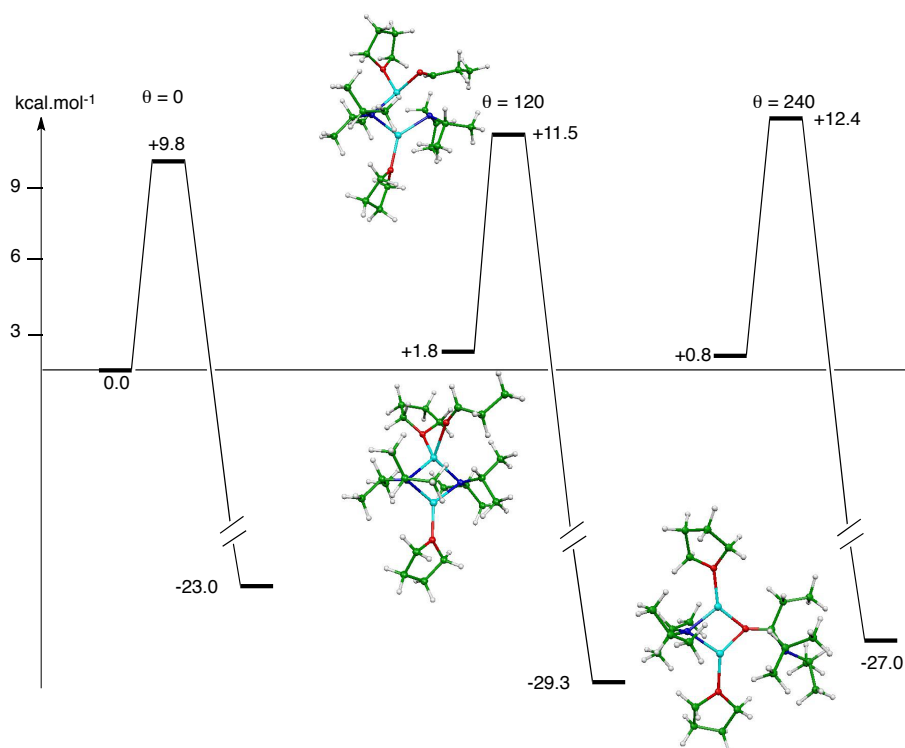

**Table 1S.** Geometrical characteristics of the deprotonation pathway ( $\gamma = 180$ ).<sup>[a]</sup>

| Entry | Geom. <sup>b</sup>                                | Status <sup>c</sup> | $(\text{MeLi})_2$ | $(\text{LDA})_2^{240}$ | $(\text{LDA})_2^{120}$ |
|-------|---------------------------------------------------|---------------------|-------------------|------------------------|------------------------|
| 1     | C <sup>2</sup> -H                                 | Cpx                 | 1.097             | 1.093                  | 1.093                  |
|       |                                                   | TS                  | 1.292             | 1.273                  | 1.307                  |
| 2     | X-H <sup>a</sup>                                  | Cpx                 | 2.579             | 4.355                  | 4.143                  |
|       |                                                   | TS                  | 1.620             | 1.625                  | 1.507                  |
| 3     | Li <sup>A</sup> -O-C <sup>1</sup>                 | Cpx                 | 121.2             | 161.3                  | 161.4                  |
|       |                                                   | TS                  | 113.4             | 112.3                  | 100.1                  |
| 4     | Li <sup>A</sup> -O-C <sup>1</sup> -C <sup>2</sup> | Cpx                 | 4.4               | 2.2                    | 5.8                    |
|       |                                                   | TS                  | -25.4             | 20.5                   | -69.2                  |
| 5     | X-Li <sup>A</sup> -O-C <sup>1</sup>               | Cpx                 | -59.4             | 86.8                   | -43.2                  |
|       |                                                   | TS                  | -33.1             | 35.8                   | 53.4                   |
| 6     | H <sup>2</sup> -C <sup>2</sup> -C <sup>1</sup> -O | Cpx                 | 22.37             | -7.570                 | 9.315                  |
|       |                                                   | TS                  | 59.56             | -63.05                 | 54.84                  |

[a]  $(\text{LDA})_2^{240}$  and  $(\text{LDA})_2^{120}$  stand for  $\theta = 240$  and  $120$ , respectively; [b] distances (2 first entries) are in Å and angles (3 last entries) in degrees; c Cpx = starting complex.
